1 **Running Title: AKG promotes the shift to C<sub>4</sub> photosynthesis**

2

3 **Title: Increased  $\alpha$ -ketoglutarate as a missing link from the C<sub>3</sub>-C<sub>4</sub> intermediate**  
4 **state to C<sub>4</sub> photosynthesis in the genus *Flaveria***

5

6 Qiming Tang<sup>1,2</sup>, Yuhui Huang<sup>1,2</sup>, Xiaoxiang Ni<sup>1,2</sup>, Ming-Ju Amy Lyu<sup>2</sup>, Genyun Chen<sup>2</sup>,  
7 Rowan Sage<sup>3</sup>, Xinguang Zhu<sup>1,2,\*</sup>

8

9 <sup>1</sup>University of Chinese Academy of Sciences (UCAS), Beijing 100049, China

10 <sup>2</sup>CAS Center for Excellence in Molecular Plant Sciences, Institute of Plant Physiology  
11 and Ecology (SIPPE), Chinese Academy of Sciences (CAS), Shanghai 200032, China

12 <sup>3</sup>University of Toronto, 25 Willcocks Street, Toronto, Canada

13 \*Correspondence: Xinguang Zhu ([zhuxg@sippe.ac.cn](mailto:zhuxg@sippe.ac.cn))

14

15

## 1 **ABSTRACT**

2       As a complex trait, C<sub>4</sub> photosynthesis has multiple independent origins in evolution.  
3       Phylogenetic evidence and theoretical analysis suggest that C<sub>2</sub> photosynthesis, which  
4       is driven by glycine decarboxylation in the bundle sheath cell, may function as a bridge  
5       from C<sub>3</sub> towards C<sub>4</sub> photosynthesis. However, the exact molecular mechanism  
6       underlying the transition between C<sub>2</sub> photosynthesis towards C<sub>4</sub> photosynthesis remains  
7       elusive. Here, we provide multiple evidence suggesting a role of higher  $\alpha$ -ketoglutarate  
8       (AKG) concentration during this transition. Metabolomic data of 12 *Flaveria* species,  
9       including multiple photosynthetic types, show that AKG concentration initially  
10       increases in the C<sub>3</sub>-C<sub>4</sub> intermediate with a further increase in C<sub>4</sub> species. Petiole feeding  
11       of AKG increased the concentrations of C<sub>4</sub> related metabolites in C<sub>3</sub>-C<sub>4</sub> and C<sub>4</sub> species  
12       but not the activity of C<sub>4</sub> related enzymes. Sequence analysis shows that glutamate  
13       synthase (Fd-GOGAT), which catalyzes the generation of glutamate using AKG, was  
14       under strong positive selection during the evolution of C<sub>4</sub> photosynthesis. Simulations  
15       with a constraint-based model for C<sub>3</sub>-C<sub>4</sub> intermediate further show that decreasing the  
16       activity of Fd-GOGAT facilitates the transition from a C<sub>2</sub>-dominant to a C<sub>4</sub>-dominant  
17       CO<sub>2</sub> concentrating mechanisms. All these provide an insight into the mechanistic switch  
18       from C<sub>3</sub>-C<sub>4</sub> intermediate to C<sub>4</sub> photosynthesis.

## 1 ABBREVIATION

### 2 Species:

- |                                                      |                                                      |
|------------------------------------------------------|------------------------------------------------------|
| 3 <b><i>F. ang:</i></b> <i>Flaveria angustifolia</i> | 9 <b><i>F. lin:</i></b> <i>Flaveria linearis</i>     |
| 4 <b><i>F. aus:</i></b> <i>Flaveria australasica</i> | 10 <b><i>F. pal:</i></b> <i>Flaveria palmeri</i>     |
| 5 <b><i>F. bid:</i></b> <i>Flaveria bidentis</i>     | 11 <b><i>F. ram:</i></b> <i>Flaveria ramosissima</i> |
| 6 <b><i>F. bro:</i></b> <i>Flaveria brownii</i>      | 12 <b><i>F. rob:</i></b> <i>Flaveria robusta</i>     |
| 7 <b><i>F. chl:</i></b> <i>Flaveria chloraefolia</i> | 13 <b><i>F. son:</i></b> <i>Flaveria sonorensis</i>  |
| 8 <b><i>F. cro:</i></b> <i>Flaveria cronquistii</i>  | 14 <b><i>F. vag:</i></b> <i>Flaveria vaginata</i>    |

15

### 16 Metabolite:

- |                                                         |                                           |
|---------------------------------------------------------|-------------------------------------------|
| 17 <b>2PG:</b> 2-phosphoglycolate                       | 31 <b>Gly:</b> Glycine                    |
| 18 <b>AKG:</b> $\alpha$ -ketoglutarate (2-oxoglutarate) | 32 <b>HPYR:</b> Hydroxypyruvate           |
| 19 <b>Ala:</b> Alanine                                  | 33 <b>MAL:</b> Malate                     |
| 20 <b>CIT:</b> Citrate                                  | 34 <b>OAA:</b> Oxaloacetate               |
| 21 <b>E4P:</b> Erythrose-4-phosphate                    | 35 <b>PenP:</b> Pentose phosphate         |
| 22 <b>F6P:</b> Fructose-6-phosphate                     | 36 <b>PEP:</b> Phosphoenol pyruvate       |
| 23 <b>FBP:</b> Fructose biphosphatase                   | 37 <b>PGA:</b> Phosphoglycerate           |
| 24 <b>Fd:</b> Ferredoxin                                | 38 <b>PYR:</b> Pyruvate                   |
| 25 <b>FUM:</b> Fumarate                                 | 39 <b>RuBP:</b> Ribulose 1,5-bisphosphate |
| 26 <b>GCEA:</b> Glycerate                               | 40 <b>S7P:</b> Sedoheptulose-7-phosphate  |
| 27 <b>GCOA:</b> Glycolate                               | 41 <b>Ser:</b> Serine                     |
| 28 <b>Gln:</b> Glutamine                                | 42 <b>SUC:</b> Succinate                  |
| 29 <b>Glu:</b> Glutamate                                | 43 <b>T3P:</b> Triose phosphate           |
| 30 <b>GLX:</b> Glyoxylate                               |                                           |

44

### 45 Gene/Enzyme:

- 46 **ALT:** Alanine transaminase [EC:2.6.1.2]  
47 **AST:** Aspartate aminotransferase [EC:2.6.1.1]  
48 **Fd-GOGAT:** Ferredoxin-dependent glutamate synthase [EC: 1.4.7.1]  
49 **GDH:** Glutamate dehydrogenase [EC:1.4.1.3 1.4.1.4]  
50 **GGT:** Glutamate: glyoxylate aminotransferase [EC:2.6.1.4]  
51 **GS:** Glutamine synthetase [EC: 6.3.1.2]  
52 **IDH:** Isocitrate dehydrogenase [EC: 1.1.1.41 1.1.1.42]  
53 **OGDH:** 2-Oxoglutarate dehydrogenase [EC:1.2.4.2]  
54 **RubisCO:** Ribulose-1,5-bisphosphate carboxylase/oxygenase [EC:4.1.1.39]  
55 **SUDH:** Succinate dehydrogenase

56

57

58

## 59 INTRODUCTION

60 Plants with C<sub>4</sub> photosynthesis have a higher light energy conversion efficiency,  
61 higher water, and nitrogen use efficiencies compared with C<sub>3</sub> plants (Dengler and  
62 Nelson, 1999; Vogan and Sage, 2011; Zhu, et al., 2010). C<sub>4</sub> plants also generally grow  
63 faster than C<sub>3</sub> plants, which contribute 23% of primary productivity on land with 3% of  
64 the species in the plant kingdom (Sage, et al., 2012). In many of over 60 lineages,  
65 species are known to be both phylogenetically intermediate and both physiologically  
66 and anatomically intermediate between the full C<sub>3</sub> and C<sub>4</sub> character states (Araus, et al.,  
67 1990; Kennedy and Laetsch, 1974; McKown and Dengler, 2007; Monson, et al., 1989;  
68 Monson, et al., 1984). These intermediates have formed the basis for studies that  
69 evaluate how C<sub>4</sub> photosynthesis has repeatedly evolved, as well as addressing the larger  
70 question of how complex traits can evolve with high frequency. While a general model  
71 of C<sub>4</sub> evolution has been developed (Heckmann, et al., 2013; Sage, et al., 2012), key  
72 steps in the process remain uncertain, notably, how the C<sub>4</sub> metabolic pathway arose  
73 from a background of modifications termed C<sub>2</sub> photosynthesis. In C<sub>2</sub> photosynthesis,  
74 CO<sub>2</sub> released from glycine decarboxylase (GDC) in bundle sheath cells (BSC) provides  
75 the substrate for RuBisCO carboxylation. On one hand, the C<sub>2</sub> photosynthesis can  
76 confer lower CO<sub>2</sub> concentrating point and increased competitive advantage over C<sub>3</sub>  
77 species under stress conditions (Monson, 1989; Vogan and Sage, 2012); on the other  
78 hand, the GDC in BSC can create an imbalance in the ammonia residue between BSC  
79 and mesophyll cell (MC) (Bräutigam and Gowik, 2016; Rawsthorne, et al., 1988).  
80 Various hypothetical pathways were proposed to address the issue of ammonia  
81 misbalance between BSC and MC (de Oliveira Dal'Molin, et al., 2010; Mallmann, et  
82 al., 2014; Monson and Rawsthorne, 2000). Among these solutions, a C<sub>4</sub>/C<sub>2</sub> mixed  
83 pathway which includes major steps of the C<sub>4</sub> photosynthetic pathways (Mallmann, et  
84 al., 2014), has been proposed and regarded as a bridge between C<sub>2</sub> and C<sub>4</sub>. However, so  
85 far, how C<sub>4</sub> metabolism emerges from intermediate photosynthesis remains elusive.

86 This study aims to address how C<sub>4</sub> photosynthesis emerged from C<sub>3</sub>-C<sub>4</sub>

87 intermediate photosynthesis. To study this question, we used the genus *Flaveria* as our  
88 model plant system. We made this choice since not only the genus of *Flaveria* is one of  
89 the youngest known C<sub>4</sub> lineages (Sage, et al., 2012), but also various aspects related to  
90 C<sub>4</sub> photosynthesis evolution have been well characterized in the genus *Flaveria*,  
91 including various physiological indicators (Brown, et al., 1986; McKown, et al., 2005),  
92 changes in the transcriptomics (Lyu, et al., 2021; Lyu, et al., 2015; McKown and  
93 Dengler, 2007), and activities of key C<sub>4</sub> enzymes (Ludwig, 2011; McKown and Dengler,  
94 2007) and metabolite concentrations related to the C<sub>2</sub> and C<sub>4</sub> photosynthesis (Borghi,  
95 et al., 2021; Gowik, et al., 2011; Ubierna, et al., 2013).

96 Specifically, in this study, we identified the content of  $\alpha$ -ketoglutarate (AKG)  
97 whose changes are most relevant to C<sub>4</sub> evolution. The comparison combined with the  
98 impacts of external application of AKG on different *Flaveria* species and model  
99 simulations show a major role of increased content of AKG during the shift from C<sub>2</sub> to  
100 C<sub>4</sub> metabolism, hence fills in a major missing link during the evolution from C<sub>3</sub>-C<sub>4</sub>  
101 intermediate to C<sub>4</sub> photosynthesis.

## 102 **RESULTS**

### 103 **Generation of *Flaveria* metabolic and transcriptomic profiles**

104 To map the changes of metabolism along C<sub>4</sub> evolution, we conducted primary  
105 metabolic profiling and transcriptomic sequencing for 12 *Flaveria* species, including 2  
106 species categorized as C<sub>3</sub> photosynthesis: *F. cronquistii* (*F. cro*) and *F. robusta* (*F. rob*),  
107 2 C<sub>4</sub> photosynthesis: *F. australasica* (*F. aus*) and *F. bidentis* (*F. bid*), 3 C<sub>4</sub>-like: *F.*  
108 *brownii* (*F. bro*), *F. vaginata* (*F. vag*) and *F. palmeri* (*F. pal*) and 5 C<sub>3</sub>-C<sub>4</sub> intermediate  
109 species: *F. sonorensis* (*F. son*), *F. angustifolia* (*F. ang*), *F. ramosissima* (*F. ram*), *F.*  
110 *chloraefolia* (*F. chl*) and *F. linearis* (*F. lin*), with 4 species from the base of the  
111 phylogeny tree, 5 species from the A clade and 3 species from the B clade of the  
112 phylogeny tree (Fig.1A) (Lyu, et al., 2015).

113 On the metabolic level, we quantified the concentrations of forty metabolites  
114 involved in the primary metabolism using HPLC-MS/MS. The profile covers

115 metabolites involved in the Calvin-Benson cycle, glycolysis, TCA cycle,  
116 photorespiration, nitrogen assimilation and several metabolites involved in energy and  
117 redox metabolism. The chlorophyll content of each species was significantly different  
118 (Fig 1A), the metabolic variations among species could be different when the  
119 calculation is based on fresh weight or chlorophyll content. In our case, the  
120 concentrations of all metabolites were normalized on total chlorophyll content basis.  
121 Almost all biological repeats are clustered together in UMAP plot, which indicated the  
122 reliability of metabolomic samples (Fig 1B).

123 On the transcriptomic level, we obtained on average 25.96 million raw reads for  
124 each sample. From 65,144 to 163,967 transcripts were *de novo* assembled based on raw  
125 reads for each species. On average, 60.1% of those transcripts were functionally  
126 annotated based on the protein reference from *Arabidopsis thaliana*. To quantify the  
127 transcript abundance of the *Flaveria* species, raw reads were mapped to assembled  
128 transcripts of corresponding species, which resulted in mapping rates percentages  
129 ranging from 73.49% to 96.43% for each sample (Table. S1). Transcriptomics profiles  
130 of all *Flaveria* species showed high Pearson correlation coefficients ranging from 0.85  
131 to 1.00 between biological replicates, suggesting the reliability of transcriptomics data.  
132 Besides, the tree topology of the twelve species based on correlations of transcriptomic  
133 abundances is largely consistent with that of the phylogenetic tree based on coding  
134 sequences on transcriptomic level (Fig 1C). This consistency suggested a co-evolution  
135 of gene sequence and transcript abundance as reported recently (Lyu, et al., 2021).

### 136 **AKG stepwise increased in the evolution of C<sub>4</sub> photosynthesis in *Flaveria***

137 We calculated the importance weight of each metabolite in distinguishment of  
138 different photosynthetic types by feature selection analysis (see Methods). Specifically,  
139 we characterized the 12 *Flaveria* species into different groups. We tested 4 different  
140 schemes of priori grouping (Fig S1A). Among the metabolites resulted in a cumulative  
141 importance of 80% (Fig S1B) in each priori grouping, five of them are shared, i.e.,  $\alpha$ -  
142 ketoglutarate (AKG), Ala, Ser, citrate (CIT) and fructose diphosphate (FBP) (Fig S2).

143 In these 4 priori grouping schemes, AKG has always been the top in importance rank  
144 (Fig 2B S1B). This result suggests that the content of AKG reflected the evolutionary  
145 trajectory of C<sub>4</sub> photosynthesis in the genus of *Flaveria*.

146 Examination of AKG in different species shows a stepwise increase of AKG  
147 concentration along the C<sub>4</sub> evolution in the genus of *Flaveria* (Fig 2A, S2). The first  
148 step occurred at *F. ram*, a type II C<sub>3</sub>-C<sub>4</sub> intermediate with an undeveloped C<sub>4</sub> CCM.  
149 Second step occurred at *F. bid*, a model C<sub>4</sub> species. That is, AKG increased at two key  
150 nodes of C<sub>4</sub> evolution, i.e., the first key node co-occurred with the preliminary C<sub>4</sub>  
151 metabolism in *F. ram*, while the second key node co-occurred with the complete C<sub>4</sub>  
152 cycle (*F. bid*). These results suggest that the gradual increase of AKG content may have  
153 a physiological significance during the evolution of C<sub>4</sub> photosynthesis.

154 We further examined what might be a direct cause of changes in AKG content. All  
155 AKG-related primary metabolic pathways are summarized in Fig. 2C, which include  
156 neo-synthesis of AKG (IDH and OGDH), nitrogen assimilation (GS-GOGAT and GDH)  
157 and transamination related reactions (AST, ALT and GGT). The expression of four  
158 enzymes (AST, ALT, GS and Fd-GOGAT) shows a regular pattern in the evolution of  
159 C<sub>4</sub> photosynthesis (Fig 2D). Though the expression of AST and ALT were increased,  
160 however, their increased expression levels do not necessarily increase AKG  
161 concentrations since these two enzymes catalyze reversible reaction. Besides, the  
162 expression levels of GS and Fd-GOGAT were evidently lower in C<sub>4</sub> species (Fig. 2D).  
163 Further, we found that the protein sequence of Fd-GOGAT was under positive selection  
164 along the evolution of C<sub>4</sub> photosynthesis ( $p = 7.49 \times 10^{-5}$ , see Methods), and the  
165 phylogenetic tree of Fd-GOGAT protein sequence is very similar to that of species (Fig  
166 2E). All these suggest that the decreased Fd-GOGAT might have been a primary reason  
167 for the increased concentration of AKG in the C<sub>4</sub> species.

168

### 169 **AKG promotes photosynthetic efficiency in developing C<sub>4</sub> photosynthesis**

170 Given the increase of AKG concentration along C<sub>4</sub> evolution, we speculate that

171 there is a positive physiological role of AKG on photosynthesis of leaves from  
172 intermediate species, at which stage when the AKG concentration initially increased.  
173 We tested this using exogenous feeding of AKG through petiole. As the species where  
174 AKG initially increased during the evolution, *F. ram* is the first to test with AKG,  
175 sorbitol (as osmic control) and Ala (another shared important metabolite in feature  
176 selection analysis, and same increased during evolution with AKG). Results show that  
177 exogenous AKG feeding indeed showed major impacts on photosynthetic properties of  
178 intermediate compared with Ala (Fig. 3). Specifically, AKG-treated *F. ram* showed a  
179 higher net photosynthesis rate compared with osmotic control, but Ala-treated *F. ram*  
180 not. Furthermore, AKG-treated *F. vag* and AKG-treated *F. aus* both showed a positive  
181 effect in photosynthesis rate (Fig. 3). All three of them belong to clade A in the  
182 phylogenetic tree. On the contrary, as a base species from phylogeny the photosynthesis  
183 rate of AKG-treated *F. ang* did not changed. In *F. bro*, a B branch C<sub>4</sub>-like *Flaveria*  
184 species, the AKG treatment did not increase, rather decreased, the photosynthetic rate  
185 (Fig. 3), suggesting that the metabolism of the B branch of *Flaveria* might have  
186 different evolutionary trajectory compared to the A branch.

187 Given the positive impact of AKG on leaf photosynthetic rate, we further tested the  
188 effects of AKG treatment on the metabolomics of these five species of *Flaveria*. We  
189 found that, except AKG itself, SUC and FUM generally increased, which indicate a  
190 higher respiration activity in all AKG-treated *Flaveria* (Fig. 4A). But the content of PEP,  
191 OAA, MAL and PYR increased in AKG-treated *F. ram* and OAA, MAL and PYR  
192 increased in AKG-treated *F. vag* (Fig. 4A). Considering the higher net photosynthesis  
193 rate under AKG-treated *F. ram* and AKG-treated *F. vag* (Fig 3), we suggest that, in  
194 AKG-treated C<sub>3</sub>-C<sub>4</sub> intermediate of *Flaveria*, the efficiency of C<sub>4</sub> photosynthesis was  
195 improved and covered the higher respiration activity.

196 <sup>13</sup>CO<sub>2</sub> labelling experiment was used to further test whether C<sub>4</sub> flux was increased  
197 in AKG-treated *F. ram*. The result shows that the accumulation rate of <sup>13</sup>C abundance  
198 in PEP, OAA and MAL was significantly faster in AKG treated *F. ram* compared to



199 osmic control group, which indicates a faster turnover rate of PEPC and NADP-MDH  
200 (Fig. 4B, C). While the enzyme activities of PEPC and NADP-MDH did not increase  
201 under AKG treatment (Fig. S3), which concludes that the AKG promotes C<sub>4</sub>  
202 photosynthetic flux by metabolic content rather than the enzyme activity.

203

### 204 **A constrained flux of Fd-GOGAT promotes the shifting from C<sub>2</sub> to C<sub>4</sub> CCM in** 205 **model simulation**

206 Given that the decreased expression of Fd-GOGAT along C<sub>4</sub> evolution and also the  
207 strong positive selection signal in this enzyme in C<sub>4</sub> species, we tested whether Fd-  
208 GOGAT can directly affect C<sub>4</sub> photosynthesis using a mechanistic C<sub>3</sub>-C<sub>4</sub> intermediate  
209 model, which includes both C<sub>2</sub> CCM and C<sub>4</sub> CCM. Specifically, we parameterized the  
210 C<sub>3</sub>-C<sub>4</sub> photosynthesis model (Mallmann, et al., 2014) with physiological and  
211 transcriptomics data of type II C<sub>3</sub>-C<sub>4</sub> *Flaveria* species and then conducted flux balance  
212 analysis. In our simulation study, several constraints in the original model were modified:  
213 a) we kept the upper bound of RubisCO Oxygenation rate and PEPC carboxylation rate  
214 but changed their lower bound to 0; b) we constrained the net AKG generation rate to  
215 a constant value and c) we constrained the synthesis of glutamate only from Fd-GOGAT  
216 (Fig 5A, See methods for detail). The simulation results show that when the flux of Fd-  
217 GOGAT decreases, the flux of GDC in BSC decreased, while the flux of NADP-ME in  
218 BSC increased when the flux of Fd-GOGAT gradually decreases (Fig. 5B). Our  
219 simulation shows that there could be a “switch point” where the system is switched  
220 from C<sub>2</sub>-dominant to C<sub>4</sub>-dominant metabolic pathways (Fig. 5B). When the system near  
221 this switch point, multiple amino acids and malate are transported in plasmodesmata to  
222 optimize ammonia balancing and C concentrating (Fig 5C). Since AKG is the substrate  
223 of Fd-GOGAT, this simulation results are consistent with a higher AKG concentration  
224 and a lower GS-GOGAT expression level in *F. ram* and C<sub>4</sub> species of *Flaveria*. These  
225 results suggests that a decreased activity of Fd-GOGAT may increase the concentration  
226 of AKG, facilitating the switch from a C<sub>2</sub>-dominant metabolism to C<sub>4</sub>-dominant

227 metabolism.

228

## 229 **Discussions**

230 This study provides multiple evidence supporting an important role of increased  
231 AKG concentration during the formation of a C<sub>4</sub> metabolism from C<sub>2</sub> photosynthesis.  
232 First, we found that there is a dramatic increase in the concentration of AKG along C<sub>4</sub>  
233 evolution on chlorophyll content basis. In previous study, the content changes of AKG  
234 in different photosynthetic types of *Flaveria* were also be reported with relative  
235 abundance (Gowik, et al., 2011), or fresh weight basis (Borghini, et al., 2021). In (Gowik,  
236 et al., 2011), AKG increased in C<sub>3</sub>-C<sub>4</sub> intermediate relative to C<sub>3</sub>, but (Borghini, et al.,  
237 2021) not, which could be a more humid condition and large temperature difference  
238 between day and night in (Borghini, et al., 2021). Second, under AKG-treatment, we  
239 found that the concentrations of critical metabolites involved in C<sub>4</sub> photosynthesis, i.e.  
240 OAA and PYR, increased (Fig 4A) and the leaf net photosynthetic rate increased (Fig  
241 3A). Finally, Fd-GOGAT showed the greatest number of amino acid residues which are  
242 under positive selection ( $p = 7.49 \times 10^{-5}$ ). Considering that the decreased Fd-GOGAT  
243 activity can in principle result in an increased concentration of AKG, the increased  
244 AKG concentration should be closely linked to the C<sub>4</sub> evolution.

245 Increase in the AKG concentration can directly increase the C<sub>4</sub> flux. AKG can  
246 affect the direction and also reaction speed of transamination reactions involving the  
247 conversion between AKG and glutamate. At 25°C (1 Standard atmospheric pressure  
248 (atm)) aqueous solution, the change in Gibbs free energy of aspartate transaminase  
249 ( $\text{AKG} + \text{Asp} \rightleftharpoons \text{Glu} + \text{OAA}$ , EC: 2.6.1.1) is  $2.8 \pm 1.1$  kJ/mol (pH: 7.0) when the ratio  
250 of reactant concentrations is 1:1:1:1. However, if the abundance of AKG increased 5  
251 times, i.e., the ratio of reactant concentrations is 5:1:1:1, the change in Gibbs free energy  
252 would be  $-1.1 \pm 1.1$  kJ/mol (pH: 7.0). Reaction would proceed in the direction of  
253 generating OAA. Therefore, the relative concentration of AKG can influence the  
254 direction of the flux of aspartate transaminase, and same with alanine aminotransferase

255 (EC: 2.6.1.2). High concentration of AKG helps maintain the high concentration of C<sub>4</sub>  
256 related metabolites (PYR and OAA), which promotes C<sub>4</sub> flux, as is clearly shown by  
257 the increased net photosynthesis rates when *F.ram* was fed with AKG through petiole  
258 (Fig 3A).

259 Besides a direct role of AKG in the C<sub>4</sub> metabolism, AKG may also influence fluxes  
260 through the C<sub>2</sub> pathway. AKG is also involve in the transamination reactions in the C<sub>2</sub>  
261 pathway (GGT, EC: 2.6.1.4) and GS-GOGAT system, decreasing the AKG  
262 concentration will decrease the flux through these reactions. Furthermore, the flux of  
263 C<sub>2</sub> CCM flux are typically influenced by a number of factors, which include the RuBP  
264 oxygenation catalyzed by RubisCO, the formation of glycine shuttle between MC and  
265 BSC, and finally the activities of enzymes, such as Fd-GOGAT. Given that the AKG  
266 can influence reactions in both the C<sub>2</sub> pathway and the C<sub>4</sub> pathway, we explicitly tested  
267 this idea with a mechanistic model with C<sub>3</sub>-C<sub>4</sub> intermediate photosynthesis. Our  
268 simulation indicates that there was a switch from C<sub>2</sub> to C<sub>4</sub> photosynthesis when the  
269 concentration of AKG is increased to a certain level (Fig. 5B). In fact, after an efficient  
270 C<sub>4</sub> photosynthesis is established, carboxylation of RubisCO in mesophyll cells can no  
271 longer be the dominant carbon assimilation mechanism, i.e. it could be gradually  
272 diminished during the evolution. In line with this, in our earlier analysis of C<sub>3</sub>-C<sub>4</sub>  
273 intermediate, i.e. a metabolic state where the C<sub>2</sub> and C<sub>4</sub> co-exist, we have shown that  
274 there is little or no competitive advantage in terms of photosynthesis per leaf area (Wang,  
275 et al., 2017).

276

## 277 **Materials and methods**

### 278 **Plant material**

279 Seeds or plants materials for *Flaveria* species used were kindly provided by Prof.  
280 Rowan Sage (University of Toronto, Canada). The plants used for sampling were grown  
281 from cuttings and grown in the greenhouse. Growth condition of the greenhouse  
282 followed our previous work (Lyu, et al., 2015), i.e. growth temperature: 28 °C;

283 photoperiod: 14h light / 10h dark; relative humidity (RH): 60-65% and photosynthetic  
284 photon flux density (PPFD): 500  $\mu\text{mol m}^{-2} \text{s}^{-1}$ .

### 285 **Metabolite treatments and gas exchange measurements**

286 To feed specific metabolites to plants, root was cut and the bottom part of the stem  
287 was soaked in 10mM solution of the corresponding metabolite separately. 10 mM  
288 sorbitol solution was used as the control group. All solutions' pH has adjusted to 6.5.  
289 Plants were illuminated under light with a photosynthetic photon flux density (PPFD)  
290 of 400  $\mu\text{mol}\cdot\text{m}^{-2}\cdot\text{s}^{-1}$  for 1 hour before gas exchange measurement. Leaves were sampled  
291 1 hour after light treatments.

292 The LI-6800 Portable Photosynthesis System (Li-Cor, Inc., Lincoln, NE, USA) was  
293 used for gas exchange measurements. For the CO<sub>2</sub> response curve measurements, air  
294 flow rate was set to be 500  $\mu\text{mol/s}$ , block temperature of the chamber was set to be  
295 28 °C, reference CO<sub>2</sub> concentration was set to be 400 ppm and the PPFD was set to be  
296 1800  $\mu\text{mol}\cdot\text{m}^{-2}\cdot\text{s}^{-1}$ . Plants were maintained under such conditions for 15 mins before  
297 the first measurement. In the first loop, the reference CO<sub>2</sub> concentration was set to the  
298 following sequence of CO<sub>2</sub> concentrations, i.e. 400, 300, 260, 220, 180, 140, 100, 50  
299 and 25 ppm; at each CO<sub>2</sub> level, leaves were maintained for 2 mins before data logging.  
300 After this sequence of CO<sub>2</sub> concentrations, the reference CO<sub>2</sub> concentration was set  
301 back to 400 ppm and maintained for 15 mins before the second loop began. In the  
302 second loop, the reference CO<sub>2</sub> concentrations was set in the following order: 400, 500,  
303 600, 700, 800ppm with plants maintained at each concentration for 2 mins before  
304 logging. The reference CO<sub>2</sub> concentration was set to 400 ppm when the second loop is  
305 finished.

### 306 **LC-MS/MS and Metabolomics analysis**

307 The LC-MS/MS analysis was done following (Arrivault, et al., 2019; Wang, et al.,  
308 2014). Similar to the sampling procedure for transcriptomics analysis, the newly fully  
309 expanded and illuminated leaves, usually the 2<sup>nd</sup> or the 3<sup>rd</sup> pair of leaves counted from  
310 the top of each branch, were used for all species. For each sample, a leaf sample with a

311 2 cm<sup>2</sup> leaf area was sampled and frozen in liquid nitrogen instantaneously. For some  
312 species which have needle-like leaves (*F. ram* and *F. chl*), two leaves were pieced  
313 together. Several leaves with same leaf position were sampled to measure the fresh  
314 weight and chlorophyll concentration, which were used to convert the concentration of  
315 metabolites between fresh weight and chlorophyll concentration basis.

316 All leaf samples were cut *in situ* and immediately transferred into a pre-frozen 2mL  
317 EP tube, then stored in liquid nitrogen for extraction. After grinding, each sample was  
318 fully dissolved with 800  $\mu$ L extraction buffer (methanol: chloroform = 7:3 (v/v), -20°C  
319 pre-cooling) and incubated under -20°C for 3 hours. Then 560  $\mu$ L distilled water  
320 (ddH<sub>2</sub>O) was add and mixed with each sample, 800  $\mu$ L supernatant was extracted after  
321 centrifugation ( $\times$ 2200g, 10min, 4°C). After that, 800ul buffer (methanol: ddH<sub>2</sub>O = 1:  
322 1(v/v), 4°C pre-cooling) was mixed with the sample for another extraction. For each  
323 sample, 1.6 mL supernatant in total was obtained by filtering the extraction buffer with  
324 a 0.2  $\mu$ M nylon filter. Among them, 1 mL was used for MS/MS analysis and 20 uL was  
325 used for QC sample. All extraction operations were performed on ice.

326 Luna NH<sub>2</sub> column (3 $\mu$ m, 100mm\*2mm, Phenomenex co. Ltd, USA) was used in  
327 the liquid chromatography. The LC gradient was set with eluent A, which has 10 mM  
328 Ammonium acetate and 5%(v/v) acetonitrile solution, with the pH adjusted to 9.5 using  
329 ammonia water and eluent B (acetonitrile): 0-1 min, 15% A; 1-8 min, 15-70% A; 8-20  
330 min, 70-95% A; 20-22 min, 95% A; 22-25 min, 15% A. In the aspect of mass  
331 spectrometry analysis, QTRAP 6500+ (AB Sciex, co. Ltd, USA) was used in MRM  
332 model, all parameters used following (Arrivault, et al., 2019; Wang, et al., 2014) with  
333 optimization (Supply Dataset 1). Concentration of all metabolites in samples were  
334 calculated based on the “concentration-peak area” curve of standard samples and  
335 converted to nmol·gFW<sup>-1</sup> with specific leaf weight of each species measured before.

### 336 <sup>13</sup>CO<sub>2</sub> labelling

337 <sup>13</sup>CO<sub>2</sub> labelling of AKG-treated *F. ram* followed (Heise, et al., 2014). All treated  
338 individuals were pre-illuminated at a PPFD of  $\sim$ 500  $\mu$ mol·m<sup>-2</sup>·s<sup>-1</sup> for 30 mins before

339 labelling. During the labelling, the CO<sub>2</sub> concentration was kept at 450 ppm, relative  
340 humidity (RH) was kept at 40-60%. When <sup>13</sup>C labelling finished, leaf sample was  
341 transferred into liquid nitrogen immediately. Then about 30 mg of frozen leaf tissue was  
342 used for metabolite extraction. The extraction protocol used is same as earlier used for  
343 metabolite profiling with parameters for mass spectrometry optimized (Supply Dataset  
344 1).

### 345 **Transcriptome assembly and quantification**

346 To obtain the transcriptomics data, we sampled the newly developed fully  
347 expanded leaves, usually the 2<sup>nd</sup> or the 3<sup>rd</sup> pair of leaves counted from the top for each  
348 species. The chosen leaves were cut and immediately put into liquid nitrogen and kept  
349 in -80 °C liquid nitrogen before further processing. Total RNA was isolated following  
350 the protocol of the PureLink<sup>TM</sup> RNA kit (Thermo Fisher Scientific, USA). Illumina  
351 sequencing was performed and analysis were conducted following our previous work  
352 (Lyu, et al., 2021). Specifically, transcript abundances of *Flaveria* samples were  
353 calculated as Transcripts Per kilobase of exon model per Million mapped reads (TPM)  
354 using the RSEM package (version 1.3.1)(Li and Dewey, 2011).

### 355 **Enzyme activity measurements**

356 The PEPC activity was assayed following (Fukayama, et al., 2003). The NADP-  
357 ME activity and the NADP-MDH activities were assayed followed (Tsuchida, et al.,  
358 2001). The PPDK activity was assayed following (Wang, et al., 2008). CARY50 UV  
359 Spectrophotometer (VARIAN Co. Ltd, USA) was used to monitor the consumption or  
360 generation of NAD(P)H at 340 nm.

### 361 **Feature selection analysis**

362 Feature selection analysis was performed with a python script  
363 (<https://github.com/WillKoehrsen/feature-selector>). The method finds features with a  
364 gradient boosting machine implemented in the LightGBM library  
365 (<https://github.com/Microsoft/LightGBM>). Analysis implemented with default  
366 parameters and the metric used for early stopping is set to the error rate for multiclass

367 classification (Ke, et al., 2017; Li, et al., 2007).

### 368 **Identification of amino acid residues under positive selection**

369 To identify positively selected amino acid residues in Fd-GOGAT in *Flaveria* C<sub>4</sub>  
370 species, we used *Flaveria* non-C<sub>4</sub> species (including C<sub>3</sub> and C<sub>3</sub>-C<sub>4</sub> species) as  
371 background. For each gene, only these genes with completely assembled sequence were  
372 included in the analysis. To do this, firstly, protein sequences of orthologous genes were  
373 aligned using the software Muscle (Edgar, 2004). Then aligned protein sequences were  
374 used to guide the codon-wise alignment of CDS with PAL2NAL (Suyama, et al., 2006).  
375 After the gaps and stop codons were removed, multiple sequence alignment results were  
376 input into the PAML software (version 4.8) for positive selection tests (Yang, 2007). In  
377 this study, the positive selection test was conducted with the branch-site model  
378 (model=2, NSsites=2) under the nucleotide substitution conditions of CodonFreq=2 (4  
379 distinct frequencies are used for each position, named F3X4). The likelihood of the null  
380 hypothesis was calculated under this branch-site model with fixed dN/dS ratio ( $\omega=1$ ,  
381 neutral). The maximum likelihood of the alternative hypothesis was calculated under  
382 this branch-site model with flexible dN/dS ratio ( $\omega>1$ , positive selection). Then, the  
383 likelihood ratio test (LRT) was conducted between the null hypothesis and the  
384 alternative hypothesis under chi-square distribution. Those genes identified to be  
385 significant (p-value < 0.05, Benjamini Hochberg (BH) adjusted) by tests under these  
386 two different nucleotide substitution parameter settings were considered as genes under  
387 positive selection.

### 388 **Simulation of C<sub>2</sub> and C<sub>4</sub> Photosynthesis with a constrained Fd-GOGAT flux**

389 A previously reported genome-scale constraint based model of C<sub>3</sub>-C<sub>4</sub>  
390 photosynthesis (Mallmann, et al., 2014) was used to test the impacts of different Fd-  
391 GOGAT activities on metabolic fluxes. We parameterized this model with parameters  
392 for a type II C<sub>3</sub>-C<sub>4</sub> state as given in (Heckmann, et al., 2013), which the flux of C<sub>4</sub>  
393 CCM and flux of C<sub>2</sub> CCM are incorporated together. In the original model, the flux of  
394 RubisCO Oxygenase and PEPC are constrained to experimental values from

395 (Heckmann, et al., 2013). In our analysis, these fluxes were set to be flexible while the  
396 flux of Fd-GOGAT was set to be under limitation. So, we kept the upper bounds of  
397 RubisCO oxygenation rate and PEPC carboxylation rate but changed the lower bound  
398 of these two fluxes to be zero. Furthermore, we set the respiration rate to be constant  
399 (Byrd, et al., 1992), i.e. the net AKG generation rate (IDH) is set as constant to ensure  
400 the AKG generation rate would not be a limitation of model (Mallmann, et al., 2014).  
401 Finally, we constrain the synthesis of glutamate can only be carried out through Fd-  
402 GOGAT, which is driven by photosynthetic reducing energy.

403

#### 404 **Acknowledgement**

405 We thank Yongyao Zhao for the support on cultivation of *Flaveria*. We thank  
406 Faming Chen for the valuable suggestions on bioinformatics analysis. We thank Wenli  
407 Hu, Xiaoyan Xu and Shanshan Wang of the public technology platform in Institute of  
408 Plant Physiology and Ecology (Shanghai, China) for the assistance on metabolomics  
409 measurement.

410

#### 411 **Accession Numbers**

412 The RNA-seq is submitted to Sequence Read Archive (SRA) in the Nation Center for  
413 Biotechnology Information (NCBI) database under the following accession number:  
414 PRJNA820135

415

#### 416 **Funding**

417 The work financially supported by Strategic Priority Research Program of the Chinese  
418 Academy of Sciences (#XDB27020105) and the NSFC general program (#31870214).  
419

#### 420 **Author Contribution**

421 QT and XZ designed the study, performed the analysis, and wrote the paper; QT, YH,  
422 XN, ML, GC conducted the experiments and performed the analysis. RFS provided  
423 many of the species and assisted with manuscript preparation.



424

425 **Competing interests**

426 The authors declare that no competing interests exist.

427

428 **Supplemental Data**

429 Supplemental DataSet1. MS parameters for metabolic profiling.

430 Supplemental DataSet2. Metabolic profiles of 12 *Flaveria* species

431 Supplemental DataSet3. Transcript profiles of 12 *Flaveria* species

432 Supplemental DataSet4. Source R code used for the simulation with constrain-based

433 models

434

## REFERENCE

- Araus, J.L., *et al.* Leaf anatomical characteristics in *Flaveria trinervia* (C 4), *Flaveria brownii* (C 4-like) and their F 1 hybrid. 1990;26(1):49-57.
- Arrivault, S., *et al.* Metabolite profiles reveal interspecific variation in operation of the Calvin-Benson cycle in both C4 and C3 plants. *J Exp Bot* 2019;70(6):1843-1858.
- Borghi, G.L., *et al.* Metabolic profiles in C3, C3-C4 intermediate, C4-like and C4 species in the genus *Flaveria*. *Journal of experimental botany* 2021.
- Bräutigam, A. and Gowik, U.J.J.o.E.B. Photorespiration connects C3 and C4 photosynthesis. 2016;67(10):2953-2962.
- Brown, R.H., *et al.* Photosynthesis of F1 hybrids between C4 and C3-C4 species of *Flaveria*. *Plant Physiology* 1986;82(1):211-217.
- Byrd, G.T., Sage, R.F. and Brown, R.H.J.P.P. A comparison of dark respiration between C3 and C4 plants. 1992;100(1):191-198.
- de Oliveira Dal'Molin, C.G., *et al.* C4GEM, a genome-scale metabolic model to study C4 plant metabolism. 2010;154(4):1871-1885.
- Dengler, N.G. and Nelson, T. Leaf structure and development in C4 plants. In.: *C4 plant biology*. San Diego: Academic Press; 1999.
- Edgar, R.C. MUSCLE: multiple sequence alignment with high accuracy and high throughput. *Nucleic acids research* 2004;32(5):1792-1797.
- Fukayama, H., *et al.* Activity regulation and physiological impacts of maize C 4-specific phospho enol pyruvate carboxylase overproduced in transgenic rice plants. 2003;77(2):227-239.
- Gowik, U., *et al.* Evolution of C4 photosynthesis in the genus *Flaveria*: how many and which genes does it take to make C4? 2011;23(6):2087-2105.
- Heckmann, D., *et al.* Predicting C4 photosynthesis evolution: modular, individually adaptive steps on a Mount Fuji fitness landscape. 2013;153(7):1579-1588.
- Heise, R., *et al.* Flux profiling of photosynthetic carbon metabolism in intact plants. *Nat Protoc* 2014;9(8):1803-1824.
- Ke, G., *et al.* Lightgbm: A highly efficient gradient boosting decision tree. 2017;30:3146-3154.
- Kennedy, R. and Laetsch, W.J.S. Plant species intermediate for C3, C4 photosynthesis. 1974;184(4141):1087-1089.
- Li, B. and Dewey, C.N. RSEM: accurate transcript quantification from RNA-Seq data with or without a reference genome. *BMC Bioinformatics* 2011;12(1):323.
- Li, P., Wu, Q. and Burges, C.J.A.i.n.i.p.s. Mcrank: Learning to rank using multiple classification and gradient boosting. 2007;20:897-904.
- Ludwig, M. The molecular evolution of  $\beta$ -carbonic anhydrase in *Flaveria*. *Journal of Experimental Botany* 2011;62(9):3071-3081.
- Lyu, M.-J.A., *et al.* The coordination of major events in C4 photosynthesis evolution in the genus *Flaveria*. 2021;11(1):1-14.
- Lyu, M.-J.A., *et al.* RNA-Seq based phylogeny recapitulates previous phylogeny of the genus *Flaveria* (Asteraceae) with some modifications. *BMC evolutionary biology* 2015;15(1):116.
- Mallmann, J., *et al.* The role of photorespiration during the evolution of C4 photosynthesis in the genus *Flaveria*. *Elife* 2014;3:e02478.

- Mallmann, J., *et al.* The role of photorespiration during the evolution of C4 photosynthesis in the genus *Flaveria*. 2014;3:e02478.
- McKown, A.D. and Dengler, N.G. Key innovations in the evolution of Kranz anatomy and C4 vein pattern in *Flaveria* (Asteraceae). *American journal of botany* 2007;94(3):382-399.
- McKown, A.D., Moncalvo, J.M. and Dengler, N.G. Phylogeny of *Flaveria* (Asteraceae) and inference of C4 photosynthesis evolution. *American Journal of Botany* 2005;92(11):1911-1928.
- Monson, R., Moore, B.d.J.P., Cell and Environment. On the significance of C3—C4 intermediate photosynthesis to the evolution of C4 photosynthesis. 1989;12(7):689-699.
- Monson, R.K. The relative contributions of reduced photorespiration, and improved water-and nitrogen-use efficiencies, to the advantages of C3–C4 intermediate photosynthesis in *Flaveria*. *Oecologia* 1989;80(2):215-221.
- Monson, R.K., Edwards, G.E. and Ku, M.S.J.B. C3-C4 intermediate photosynthesis in plants. 1984;34(9):563-574.
- Monson, R.K. and Rawsthorne, S. CO<sub>2</sub> assimilation in C3-C4 intermediate plants. In, *Photosynthesis*. Springer; 2000. p. 533-550.
- Rawsthorne, S., *et al.* Distribution of photorespiratory enzymes between bundle-sheath and mesophyll cells in leaves of the C3–C4 intermediate species *Moricandia arvensis* (L.) DC. 1988;176(4):527-532.
- Sage, R.F., Sage, T.L. and Kocacinar, F. Photorespiration and the evolution of C4 photosynthesis. *Annu Rev Plant Biol* 2012;63:19-47.
- Suyama, M., Torrents, D. and Bork, P. PAL2NAL: robust conversion of protein sequence alignments into the corresponding codon alignments. *Nucleic acids research* 2006;34:W609-W612.
- Tsuchida, H., *et al.* High level expression of C4-specific NADP-malic enzyme in leaves and impairment of photoautotrophic growth in a C3 plant, rice. 2001;42(2):138-145.
- Ubierna, N., *et al.* The efficiency of C4 photosynthesis under low light conditions in *Zea mays*, *Miscanthus x giganteus* and *Flaveria bidentis*. 2013;36(2):365-381.
- Vogan, P.J. and Sage, R.F. Water-use efficiency and nitrogen-use efficiency of C3-C4 intermediate species of *Flaveria* Juss.(Asteraceae). *Plant, Cell & Environment* 2011;34(9):1415-1430.
- Vogan, P.J. and Sage, R.F. Effects of low atmospheric CO<sub>2</sub> and elevated temperature during growth on the gas exchange responses of C3, C3–C4 intermediate, and C4 species from three evolutionary lineages of C4 photosynthesis. *Oecologia* 2012;169(2):341-352.
- Wang, D., *et al.* Cool C4 photosynthesis: pyruvate Pi dikinase expression and activity corresponds to the exceptional cold tolerance of carbon assimilation in *Miscanthus x giganteus*. 2008;148(1):557-567.
- Wang, L., *et al.* Comparative analyses of C(4) and C(3) photosynthesis in developing leaves of maize and rice. *Nat Biotechnol* 2014;32(11):1158-1165.
- Wang, S., *et al.* C4 photosynthesis in C3 rice: a theoretical analysis of biochemical and anatomical factors. 2017;40(1):80-94.
- Yang, Z.H. PAML 4: Phylogenetic analysis by maximum likelihood. *Mol Biol Evol* 2007;24(8):1586-1591.
- Zhu, X.-G., Long, S.P. and Ort, D.R. Improving photosynthetic efficiency for greater yield. *Annual Review of Plant Biology* 2010;61:235-261.

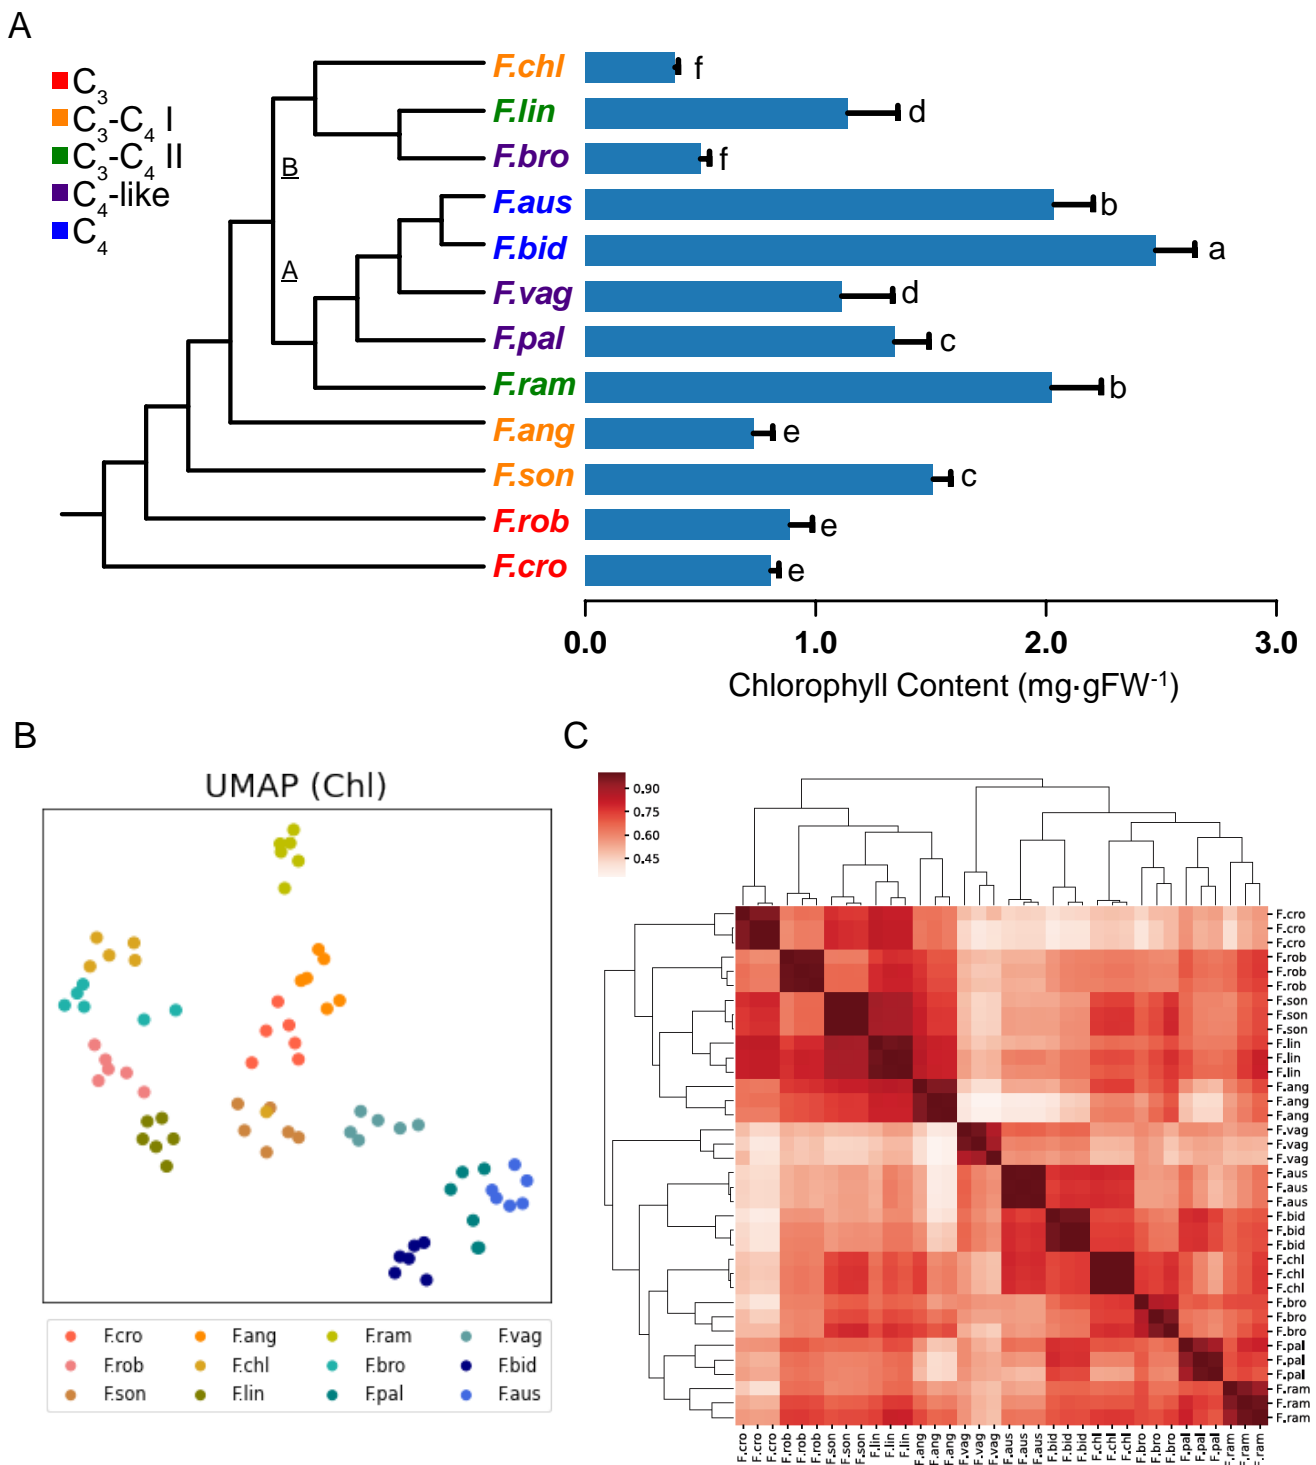

Figure 1. Overview of *Flaveria* metabolic and transcriptomic profiles. A) Phylogenetic tree and chlorophyll content of 12 flaveria species sampled. Different letters indicate a significant difference between the medians (Kruskal-Wallis tests,  $\alpha = 0.05$ , p-values adjusted using false discovery rate) (Benjamini and Hochberg, 1995).  $n = 5$ . B) Dimensionality reduction analysis (UMAP) of metabolomics data normalized on chlorophyll content. Data were normalized using Z-score. C) Heatmap of Pearson correlation coefficient among transcriptomics samples. Duplicate species names represent different biological samples.

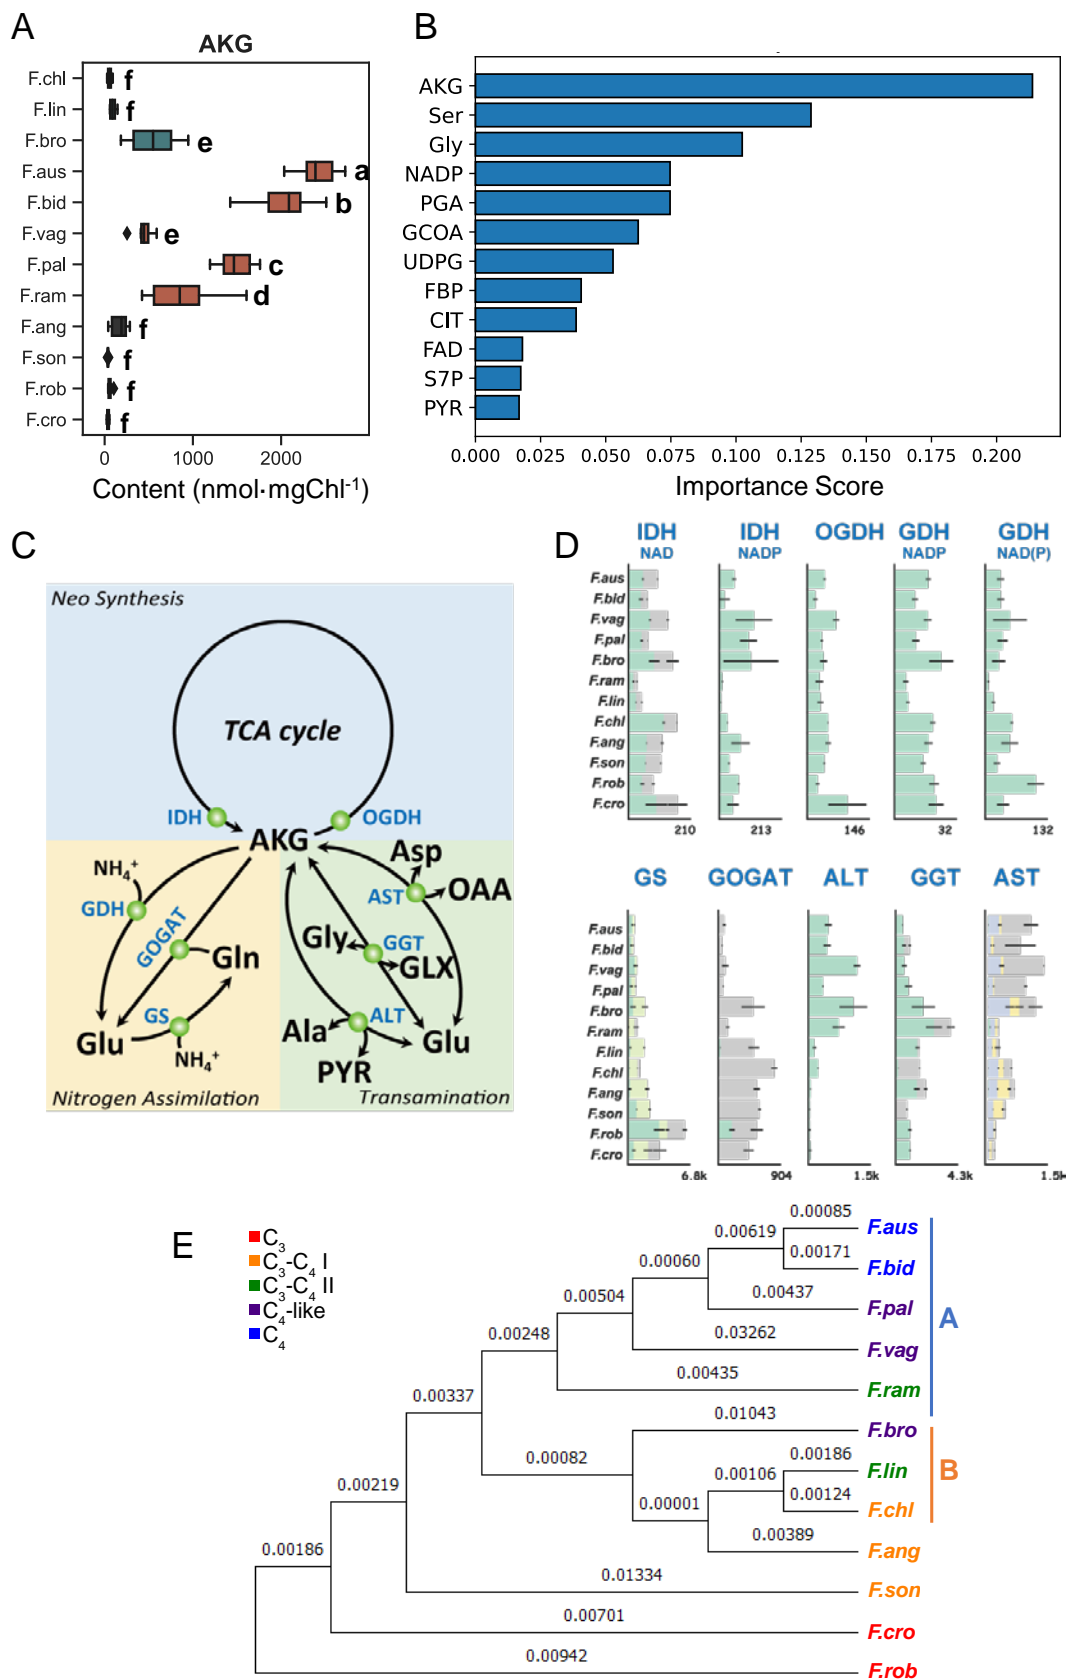

Figure 2. A) Box plot of AKG content. Box with black background indicate the ancestor species in phylogenetic tree, orange indicate the species belong to clade A in phylogenetic tree, and green indicate the species belong to clade B in phylogenetic tree. Different letters indicate a significant difference between the medians (Kruskal-Wallis tests,  $\alpha = 0.05$ , p-values adjusted using false discovery rate) (Benjamini and Hochberg, 1995).  $n = 6$ . B) important metabolites in scheme #1 with a cutoff of 80% cumulative importance (See Fig S1 for other schemes). C) Metabolic pathways related to AKG formation and metabolism. D) AKG-related gene expression (TPM) plots for all expressed homologous genes annotated with same E.C. number. Error bar indicates S.D.,  $n = 3$ . The maximum total expression value in all species is marked in the lower right. E) Phylogenetic tree of Fd-GOGAT (AT5G04140) protein sequence. The value above the branch represents the length of the phylogenetic branch. A and B represent the species belonging to clade A and clade B on the phylogenetic tree of *Flaveria* respectively.

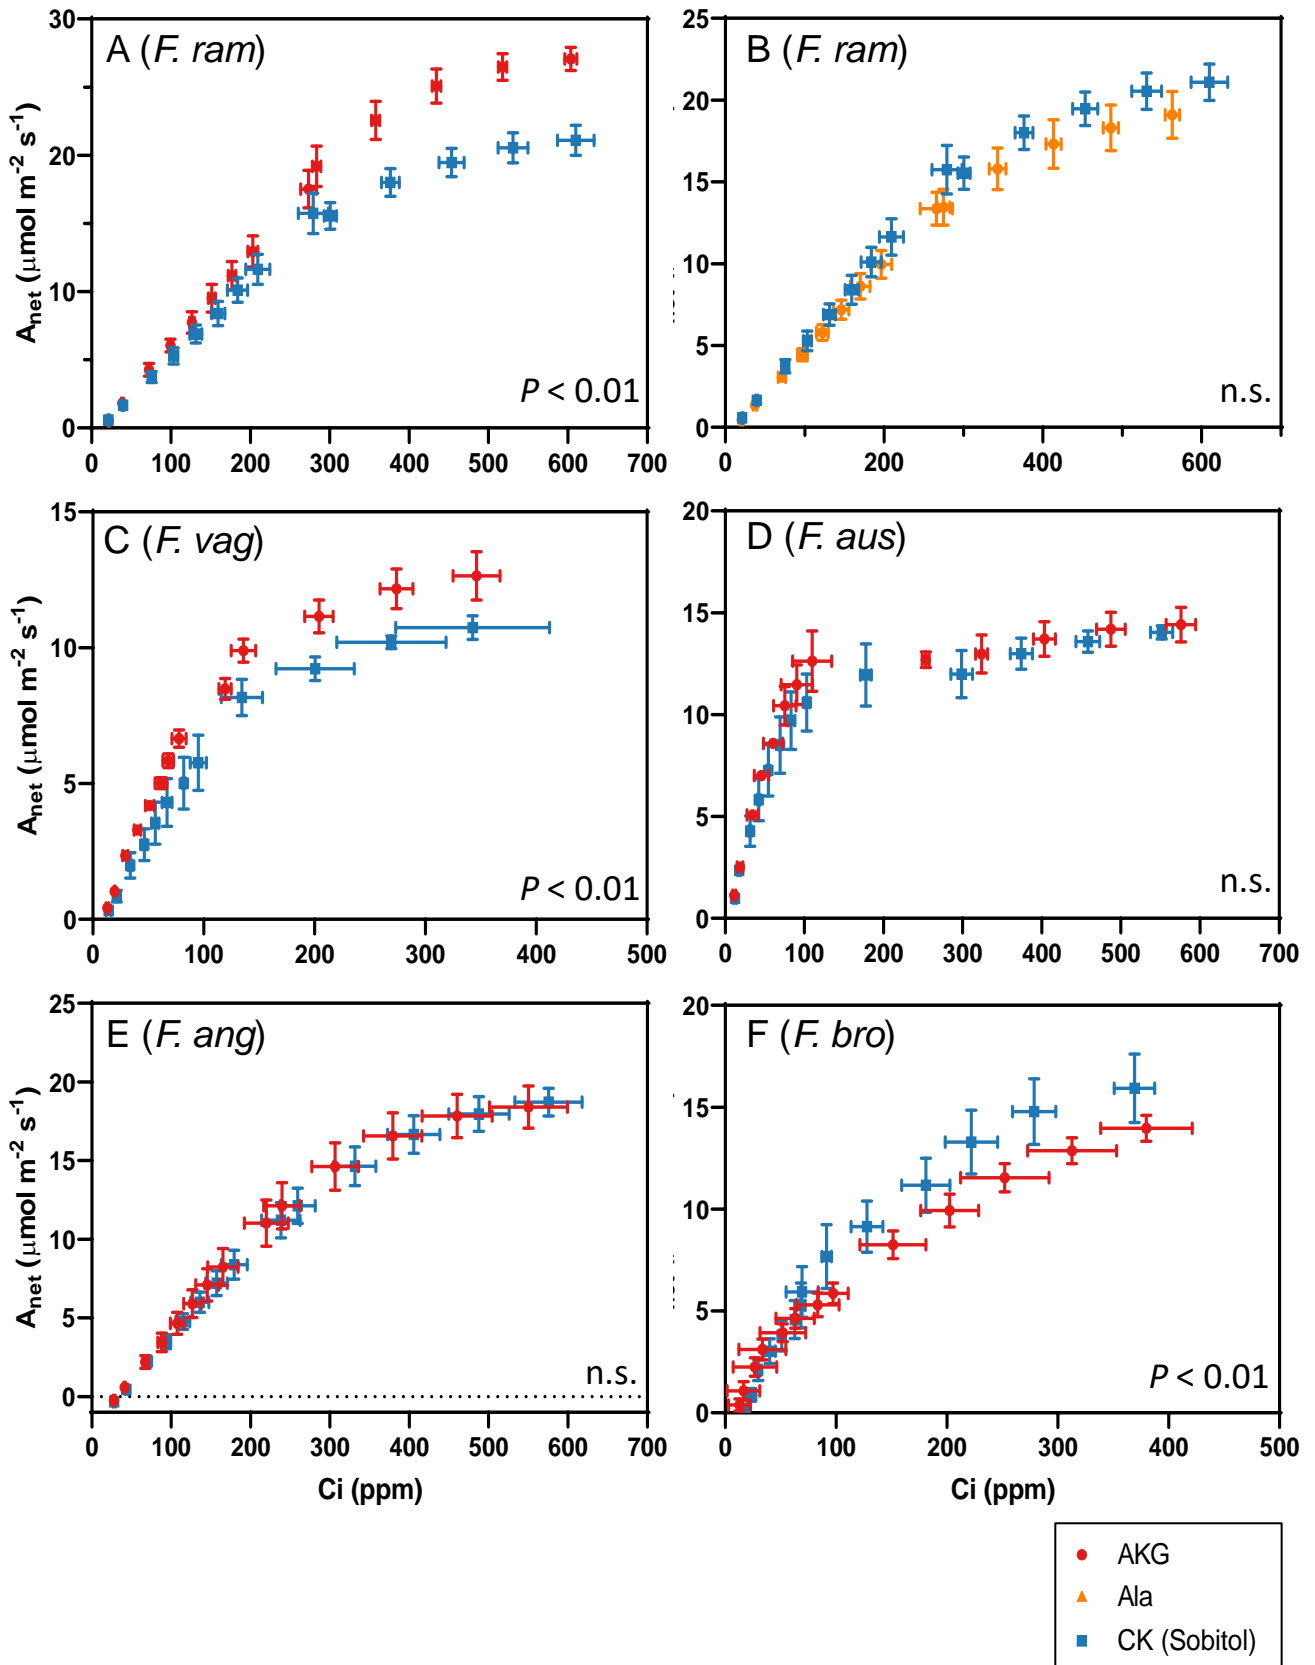

Figure 3. Exogenous AKG showed differential effects on *Flaveria* species with different photosynthetic types. A-F) CO<sub>2</sub> response curves of *Flaveria* species treated with metabolites. The data points were the average values of 3-4 biological samples in each group, and the error bar was the standard error (S.E.). Significant differences between treatments were identified using contrasts analysis (lsmeans package, R), n.s.: not significant.

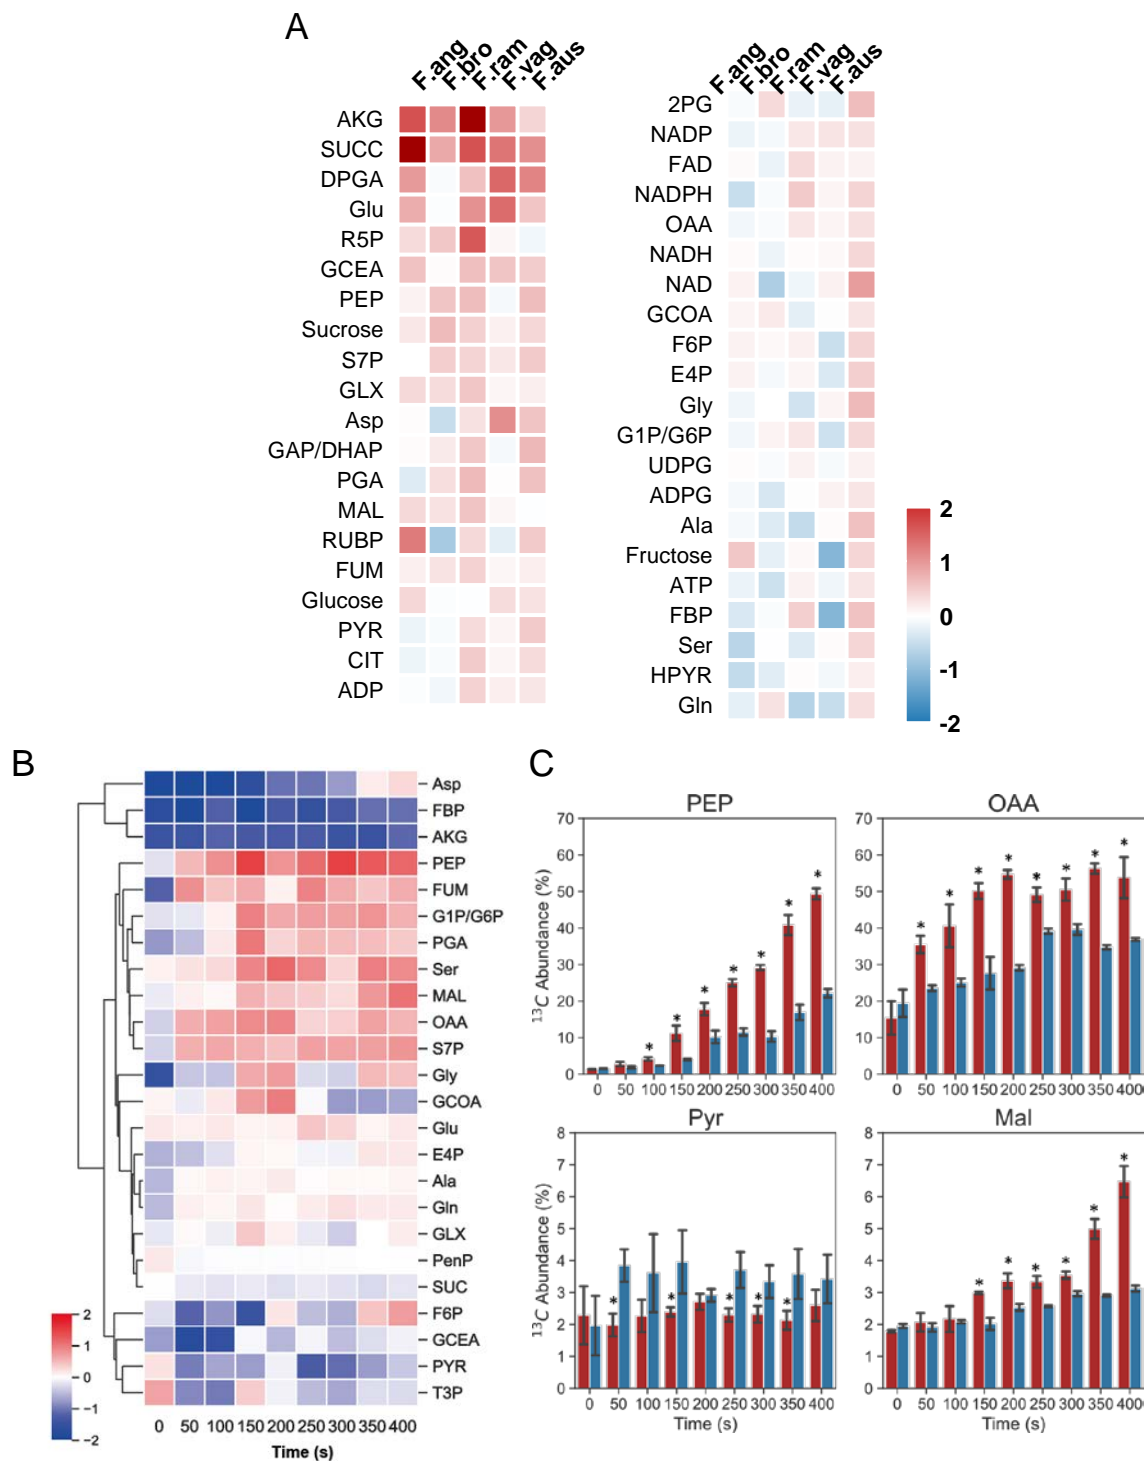

A

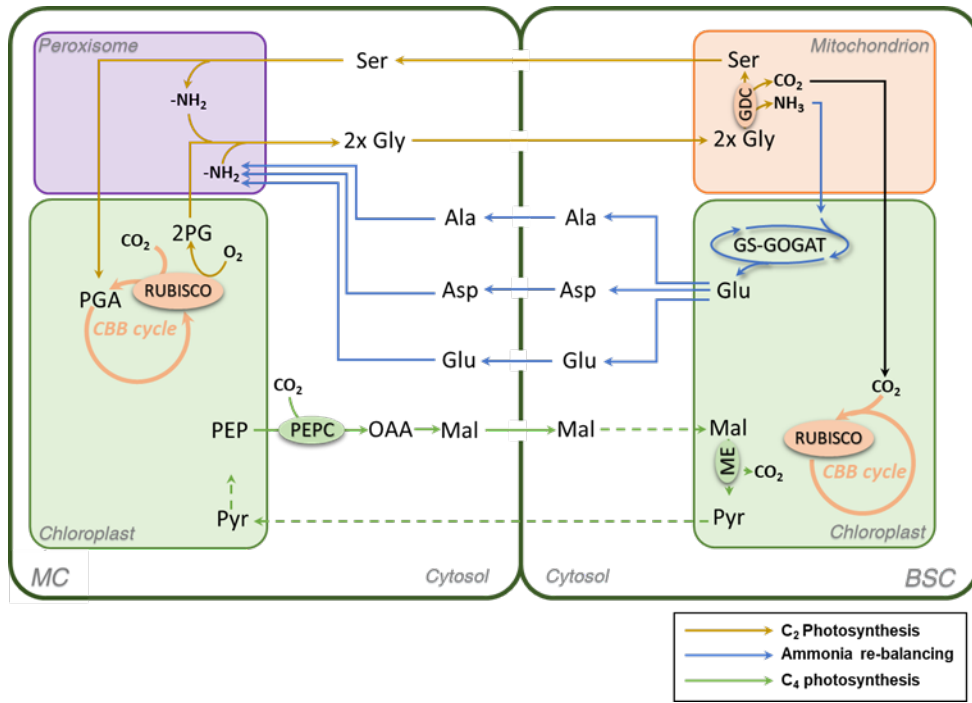

B

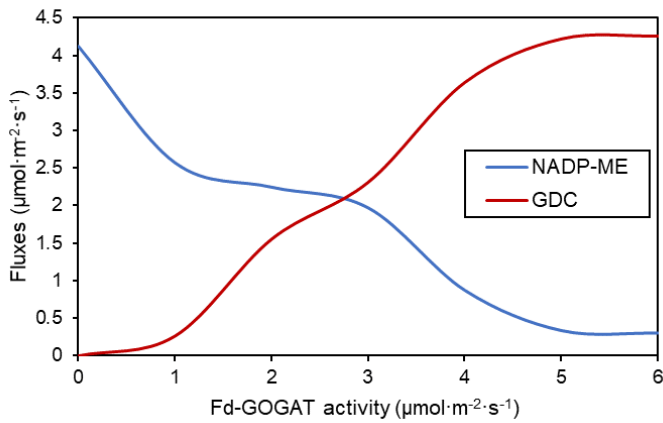

C

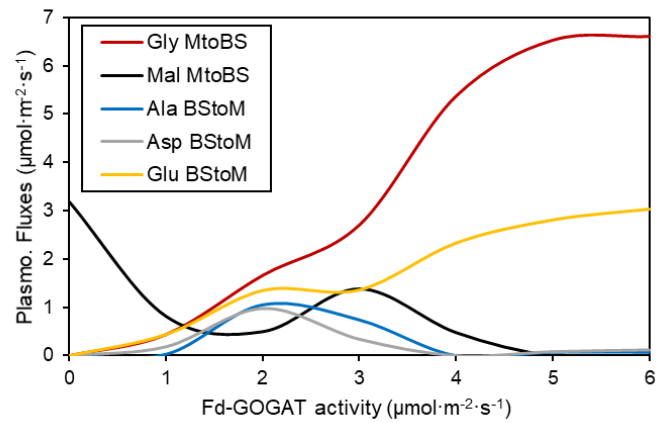

Figure 5. Model simulations suggest that a low Fd-GOGAT activity facilitates the shifting from a C<sub>2</sub> to C<sub>4</sub> CCM in model simulations. A) Mechanistic switching from C<sub>2</sub>/C<sub>4</sub> mixed photosynthesis to C<sub>4</sub> photosynthesis when GS-GOGAT activity is limited. B) Predicted fluxes of NADP-ME and GDC in bundle sheath cells at different activities of Fd-GOGAT. C) Predicted plasmodesmata transfer fluxes of amino acids and malate between mesophyll cells and bundle sheath cells at different activities of Fd-GOGAT. MtoBS: flux transfer from mesophyll cells to bundle sheath cells; BStoM: flux transfer from bundle sheath cells to mesophyll cells.



**Table S1** Statistics of transcriptomics data

| <b>Species</b> | <b>Clean Base (GB)</b> | <b>Assembled Transcripts</b> | <b>Mapping Ratio (%)</b> |
|----------------|------------------------|------------------------------|--------------------------|
| F.ang          | 6.7 / 7.94 / 6.94      | 75,861                       | 82.00 / 82.72 / 83.01    |
| F.aus          | 9.49 / 7.53 / 6.78     | 73,853                       | 83.60 / 83.40 / 83.12    |
| F.bid          | 7.62 / 8.34 / 7.85     | 65,144                       | 86.58 / 86.43 / 85.05    |
| F.bro          | 7.36 / 9.34 / 10.29    | 85,926                       | 84.12 / 84.06 / 83.13    |
| F.chl          | 6.04 / 5.16 / 7.58     | 77,447                       | 83.07 / 82.68 / 83.02    |
| F.cro          | 6.74 / 8.3 / 6.79      | 91,918                       | 77.66 / 77.59 / 79.23    |
| F.lin          | 7.1 / 9.13 / 6.63      | 110,727                      | 84.59 / 84.68 / 84.94    |
| F.pal          | 7.11 / 10.81 / 7.35    | 88,628                       | 84.82 / 73.49 / 80.70    |
| F.ram          | 6.37 / 6.25 / 7.6      | 163,967                      | 81.03 / 81.58 / 81.65    |
| F.rob          | 6.95 / 6.23 / 7.1      | 80,514                       | 80.01 / 82.41 / 82.95    |
| F.son          | 7.06 / 7.03 / 6.73     | 74,137                       | 80.73 / 81.26 / 82.14    |
| F.vag          | 6.88 / 7.49 / 10.5     | 80,855                       | 84.31 / 85.21 / 84.17    |

For each species, clean bases and mapping ratio are counted for three biological samples and distinguished with a slash in table. Transcripts were assembled with pooled reads from all three biological samples

A

|               | #1                             | #2                             | #3                                | #4                   |
|---------------|--------------------------------|--------------------------------|-----------------------------------|----------------------|
| <i>F. cro</i> | C <sub>3</sub>                 | C <sub>3</sub>                 | C <sub>3</sub>                    | Ancestors            |
| <i>F. rob</i> |                                |                                |                                   |                      |
| <i>F. son</i> | C <sub>3</sub> -C <sub>4</sub> | C <sub>3</sub> -C <sub>4</sub> | C <sub>3</sub> -C <sub>4</sub> I  |                      |
| <i>F. ang</i> |                                |                                |                                   |                      |
| <i>F. chl</i> |                                |                                | C <sub>3</sub> -C <sub>4</sub> II | Clade A              |
| <i>F. lin</i> |                                |                                |                                   |                      |
| <i>F. ram</i> |                                |                                | C <sub>4</sub> -like              | C <sub>4</sub> -like |
| <i>F. pal</i> |                                |                                |                                   |                      |
| <i>F. vag</i> | C <sub>4</sub>                 | C <sub>4</sub>                 | C <sub>4</sub>                    | Clade A              |
| <i>F. bro</i> |                                |                                |                                   |                      |
| <i>F. bid</i> |                                |                                |                                   |                      |
| <i>F. aus</i> |                                |                                |                                   |                      |

B

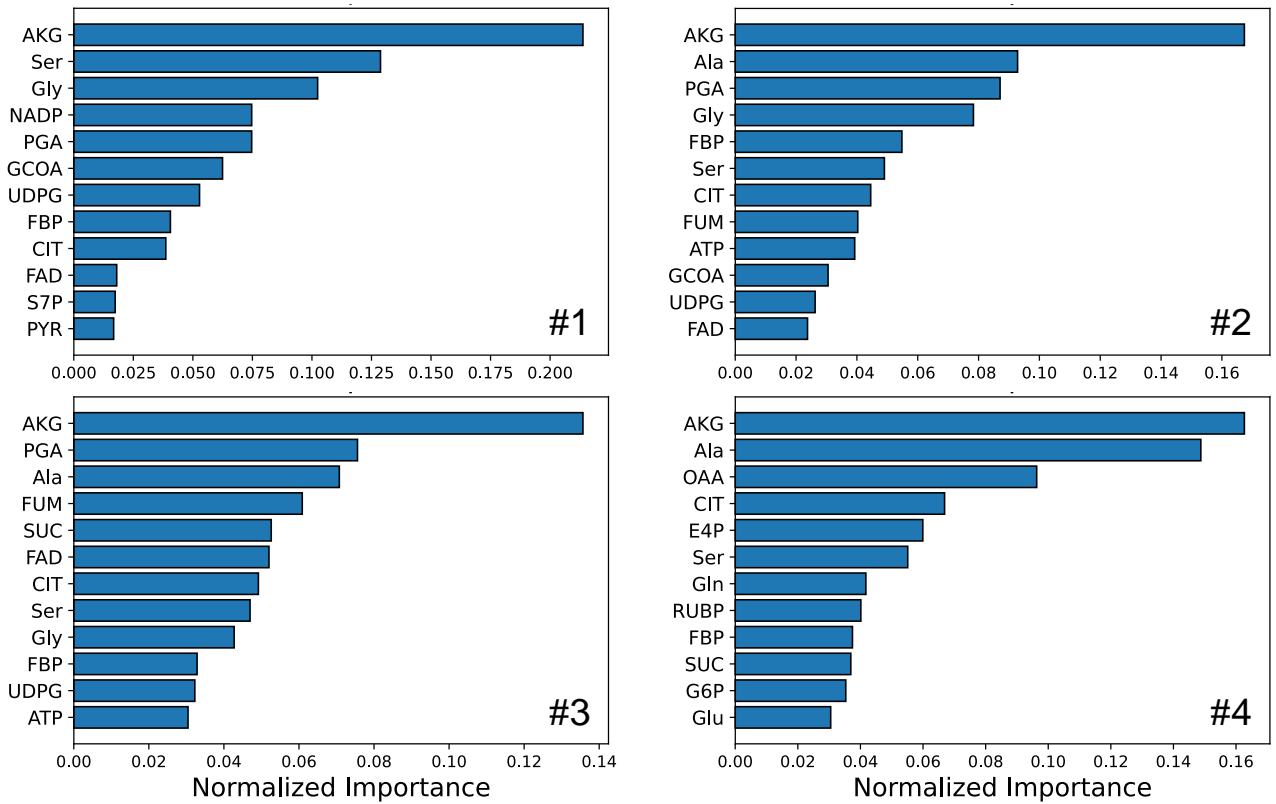

Figure S1. Feature selection analysis of metabolic data. A) Four different schemes for prior grouping. B) important metabolites in each scheme with a cutoff of 80% cumulative importance

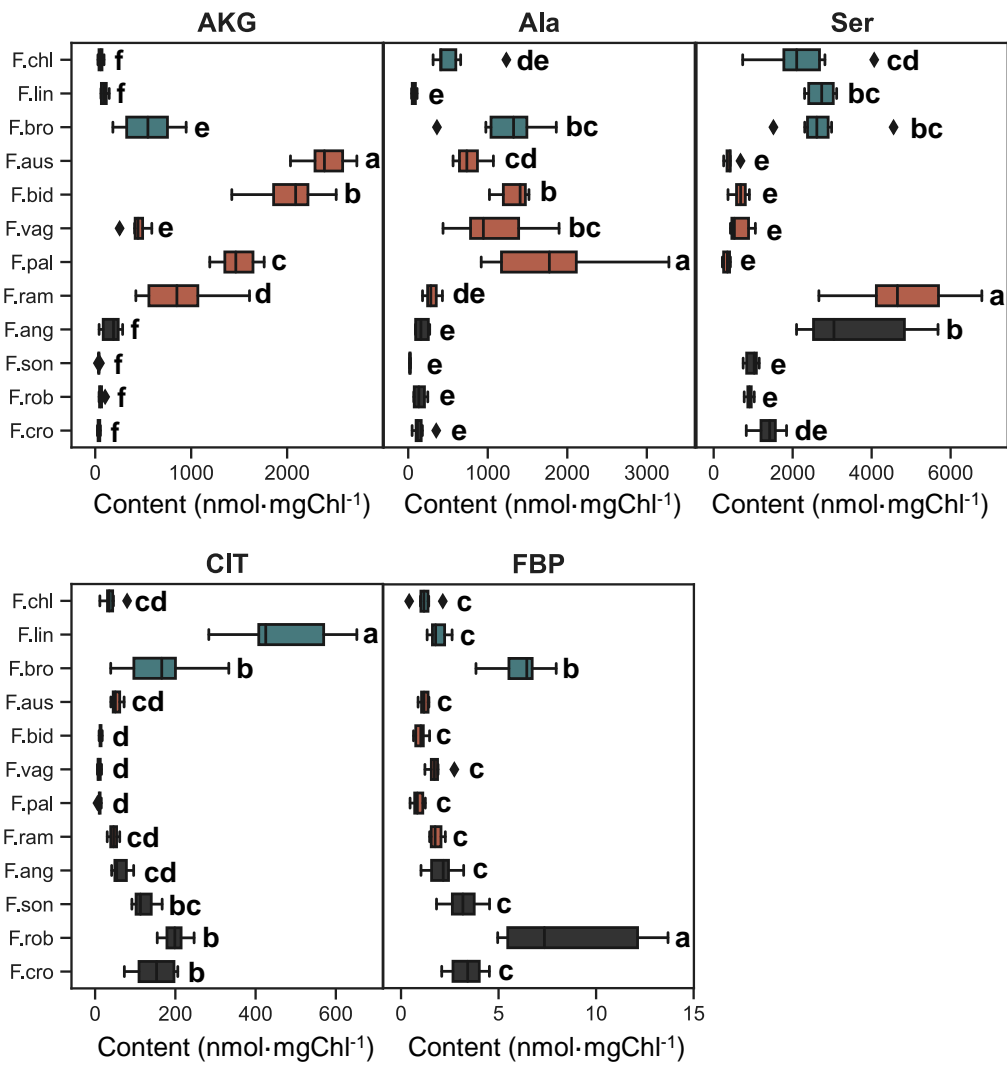

Figure S2. Box plot of five important metabolites. Box with black background indicate the ancestor species in phylogenetic tree, orange indicate the species belong clade A in phylogenetic tree, and green indicate the species belong clade B in phylogenetic tree. Different letters indicate a significant difference between the medians (Kruskal-Wallis tests,  $\alpha = 0.05$ , p-values adjusted using false discovery rate) (Benjamini and Hochberg, 1995). n = 6.

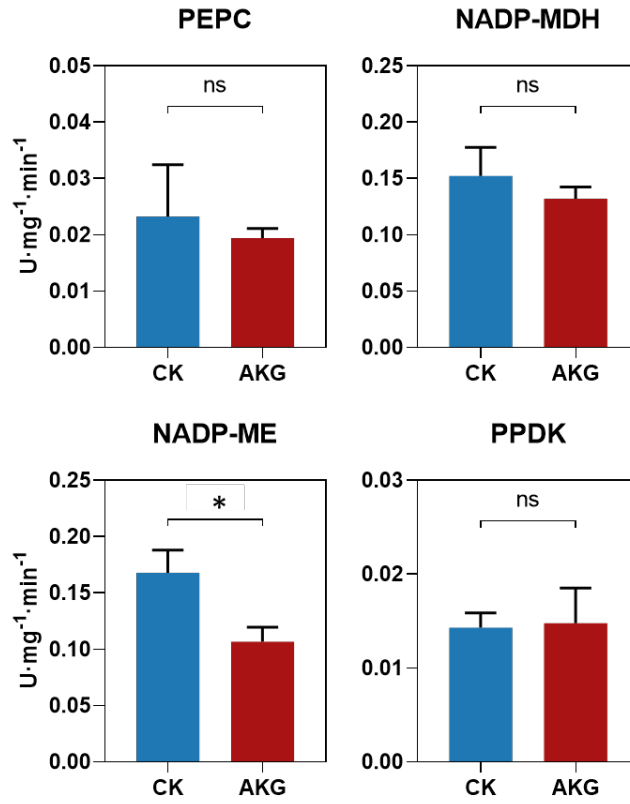

Figure S3. Enzyme activities of C4 photosynthesis in AKG-treated F. ram. Error bar indicates S.D., n = 4. ns.: not significant, \*: p < 0.05 (Student's t-test).
